# Supplementary material
Source: PubMed Central journal article supplement (PMC3556508)
Supplement: NIHMS424556-supplement.pdf [file NIHMS424556-supplement.pdf]

## Supplementary Online Content

Neeland IJ, Turer AT, Ayers CR, et al. Dysfunctional adiposity and the risk of prediabetes and type 2 diabetes in obese adults. *JAMA*. doi:10.1001/2012.jama.11132.

eTable 1. Baseline characteristics of obese participants from DHS-1 without type 2 diabetes or cardiovascular disease who did and did not return for the DHS-2 visit

eTable 2. Characteristics of obese individuals with normal baseline fasting glucose who remained free from pre-diabetes or diabetes, those who developed pre-diabetes, and those who progressed to diabetes at follow-up

eFigure. Unadjusted associations of visceral fat mass with incident pre-diabetes or type 2 diabetes stratified by sex, race, BMI category, presence of metabolic syndrome, and weight gain, among those with normal fasting glucose at baseline. Odds ratios represent a 1-standard deviation increment in the log-transformed visceral fat mass variable, which is approximately equal to 1.4 kg

This supplementary material has been provided by the authors to give readers additional information about their work.

**eTable 1.** Baseline characteristics of obese participants from DHS-1 without type 2 diabetes or cardiovascular disease who did and did not return for the DHS-2 visit

| Variable                             | Participated in DHS-2<br>(n=732) | Did not participate in DHS-2<br>(n=345) | P-value |
|--------------------------------------|----------------------------------|-----------------------------------------|---------|
| <b>Baseline</b>                      |                                  |                                         |         |
| Age (years)                          | 43 (36, 51)                      | 41 (34, 50)                             | 0.03    |
| Male, No. (%)                        | 258 (35.2)                       | 146 (42.3)                              | 0.03    |
| Race, No. (%)                        |                                  |                                         |         |
| White                                | 212 (29.0)                       | 83 (24.1)                               | 0.09    |
| Black                                | 395 (54.0)                       | 180 (52.2)                              | 0.58    |
| Hispanic                             | 120 (16.4)                       | 77 (22.3)                               | 0.02    |
| Weight (kg)                          | 98.4 (87.5, 109.8)               | 98.0 (87.1, 109.3)                      | 0.69    |
| Body Mass Index (kg/m <sup>2</sup> ) | 35.0 (32.0, 38.9)                | 34.4 (31.8, 38.6)                       | 0.21    |
| Waist Circumference (cm)             | 109.0 (101.0, 117.5)             | 108.7 (101.5, 116.5)                    | 0.68    |
| Waist/Hip ratio                      | 0.91 (0.85, 0.98)                | 0.92 (0.87, 0.98)                       | 0.08    |
| Impaired Fasting Glucose, No. (%)    | 211 (28.8)                       | 96 (27.8)                               | 0.50    |
| Family History of Diabetes, No. (%)  | 290 (44.1)                       | 129 (42.6)                              | 0.66    |
| Hypertension, No. (%)                | 258 (35.8)                       | 132 (38.7)                              | 0.36    |
| Metabolic Syndrome, No. (%)          | 348 (47.5)                       | 164 (47.5)                              | 1.00    |
| Total Fat Mass (kg)                  | 35.5 (29.2, 43.4)                | 34.1 (28.0, 42.7)                       | 0.08    |
| Abdominal Visceral Fat (kg)          | 2.5 (1.9, 3.1)                   | 2.5 (2.0, 3.1)                          | 0.84    |
| Glucose (mg/dL)                      | 93 (87, 101)                     | 93 (85, 100)                            | 0.30    |
| HOMA-IR                              | 4.0 (2.7, 5.8)                   | 4.0 (2.8, 5.8)                          | 0.87    |
| Fructosamine (μmol/L)                | 200 (189, 212)                   | 200 (189, 212)                          | 0.94    |
| Adiponectin (ng/ml)                  | 5.8 (4.2, 8.4)                   | 5.5 (3.8, 8.1)                          | 0.10    |
| hs-CRP (mg/L)                        | 4.3 (2.1, 9.4)                   | 4.2 (2.0, 9.3)                          | 0.57    |
| Total Cholesterol (mg/dL)            | 177 (155, 203)                   | 183 (156, 210)                          | 0.15    |
| Triglycerides (mg/dL)                | 101 (73, 149)                    | 105 (76, 157)                           | 0.19    |
| HDL-C (mg/dL)                        | 46 (39, 54)                      | 45 (37, 53)                             | 0.06    |

Data are presented as median (25<sup>th</sup>, 75<sup>th</sup> percentile) or proportion (%) where appropriate

Abbreviations: HDL-C= high-density lipoprotein cholesterol; HOMA-IR=homeostasis model assessment of insulin resistance; hs-CRP= high-sensitivity C-reactive protein

**eTable 2.** Characteristics of obese individuals with normal baseline fasting glucose who remained free from pre-diabetes or diabetes, those who developed pre-diabetes, and those who progressed to diabetes at follow-up.

| Variable                             | No Pre-diabetes or Diabetes (n=312) | Incident Pre-diabetes (n=161) | Incident Diabetes (n=39) | P-trend |
|--------------------------------------|-------------------------------------|-------------------------------|--------------------------|---------|
| <b>Baseline</b>                      |                                     |                               |                          |         |
| Age (years)                          | 41 (34, 48)                         | 44 (37, 52)                   | 44 (39, 51)              | 0.001   |
| Male, No. (%)                        | 76 (24.4)                           | 69 (42.9)                     | 17 (43.6)                | <0.001  |
| Race, No. (%)                        |                                     |                               |                          |         |
| White                                | 101 (32.4)                          | 38 (23.6)                     | 9 (23.1)                 | 0.04    |
| Black                                | 164 (52.6)                          | 98 (60.9)                     | 22 (56.4)                | 0.13    |
| Hispanic                             | 44 (14.1)                           | 24 (14.9)                     | 7 (17.9)                 | 0.60    |
| Weight (kg)                          | 95.3 (86.0, 107.1)                  | 98.4 (88.9, 109.8)            | 105.2 (89.5, 113.5)      | 0.02    |
| Body Mass Index (kg/m <sup>2</sup> ) | 34.7 (31.8, 38.2)                   | 35.1 (32.1, 38.5)             | 35.5 (32.9, 40.9)        | 0.30    |
| Waist Circumference (cm)             | 107.3 (98.5, 116.0)                 | 107.5 (101.5, 117.0)          | 112.0 (104.0, 121.0)     | 0.006   |
| Waist/Hip ratio                      | 0.88 (0.83, 0.94)                   | 0.93 (0.86, 0.99)             | 0.95 (0.88, 1.01)        | <0.001  |
| Family History of Diabetes, No. (%)  | 97 (35.1)                           | 71 (48.0)                     | 23 (62.2)                | 0.001   |
| Hypertension, No. (%)                | 77 (25.0)                           | 66 (41.5)                     | 19 (50.0)                | <0.001  |
| Systolic Blood Pressure (mmHg)       | 121 (113, 131)                      | 124 (115, 135)                | 133 (121, 146)           | <0.001  |
| Metabolic Syndrome, No. (%)          | 94 (30.1)                           | 67 (41.6)                     | 15 (38.5)                | 0.04    |
| Statin Use, No. (%)                  | 11 (3.6)                            | 11 (7.1)                      | 3 (7.9)                  | 0.08    |
| Physical Activity (METs*min/week)    | 106 (0, 480)                        | 84 (0, 426)                   | 160 (0, 420)             | 0.94    |
| <b>DEXA Fat Measures</b>             |                                     |                               |                          |         |
| Total Fat Mass (kg)                  | 36.1 (30.5, 43.4)                   | 34.5 (28.3, 42.4)             | 36.1 (30.2, 44.8)        | 0.16    |
| Total Lean Mass (kg)                 | 54.3 (48.8, 64.6)                   | 60.3 (50.8, 69.9)             | 59.6 (51.7, 72.5)        | <0.001  |
| Percent Body Fat (%)                 | 40.8 (34.9, 44.8)                   | 38.5 (29.5, 44.4)             | 41.7 (29.0, 44.0)        | 0.01    |
| Lower Body Fat Mass (kg)             | 13.3 (10.6, 16.5)                   | 12.0 (9.0, 16.3)              | 11.3 (9.9, 15.4)         | 0.01    |
| Truncal Fat Mass (kg)                | 17.7 (14.9, 21.3)                   | 16.9 (14.8, 20.8)             | 17.8 (16.2, 22.4)        | 0.76    |
| <b>MRI Fat Measures</b>              |                                     |                               |                          |         |
| Abdominal Subcutaneous Fat (kg)      | 6.7 (5.2, 8.7)                      | 6.4 (5, 8)                    | 8.2 (5.6, 9.9)           | 0.79    |
| Abdominal Visceral Fat (kg)          | 2.2 (1.7, 2.8)                      | 2.6 (1.9, 3.2)                | 2.8 (2.2, 3.3)           | <0.001  |
| Liver Fat (%)                        | 3.9 (2.7, 6.8)                      | 5.2 (3.3, 9.3)                | 5.7 (4.6, 11.3)          | <0.001  |
| <b>Insulin Resistance</b>            |                                     |                               |                          |         |
| Glucose (mg/dL)                      | 88 (83, 93)                         | 93 (88, 97)                   | 91 (83, 96)              | <0.001  |
| Insulin (μU/mL)                      | 15.0 (9.8, 22.2)                    | 18.0 (13.3, 23.5)             | 19.9 (13.3, 22.9)        | <0.001  |
| HOMA-IR                              | 3.2 (2.1, 4.7)                      | 4.1 (3.0, 5.2)                | 4.2 (3.0, 5.5)           | <0.001  |
| Fructosamine (μmol/L)                | 195 (187, 207)                      | 201 (189, 216)                | 205 (190, 214)           | <0.001  |
| <b>Adipokines and Other</b>          |                                     |                               |                          |         |
| Leptin (μg/L)                        | 28.1 (16.4, 40.8)                   | 25.9 (10.8, 42.5)             | 23.5 (10.1, 38.0)        | 0.08    |
| Adiponectin (ng/mL)                  | 6.5 (4.6, 9.5)                      | 5.4 (4.1, 7.7)                | 4.7 (3.9, 8.4)           | <0.001  |
| hs-CRP (mg/L)                        | 4.8 (2.2, 10.0)                     | 4.3 (1.9, 11.0)               | 3.6 (1.7, 9.0)           | 0.21    |

**eTable 2.** Characteristics of obese individuals with normal baseline fasting glucose who remained free from pre-diabetes or diabetes, those who developed pre-diabetes, and those who progressed to diabetes at follow-up (continued).

| Variable                                                 | No Pre-diabetes or Diabetes (n=312) | Incident Pre-diabetes (n=161) | Incident Diabetes (n=39) | P-trend |
|----------------------------------------------------------|-------------------------------------|-------------------------------|--------------------------|---------|
| <i>Lipids</i>                                            |                                     |                               |                          |         |
| Total Cholesterol (mg/dL)                                | 175 (151, 203)                      | 179 (159, 204)                | 191 (153, 203)           | 0.16    |
| HDL-C (mg/dL)                                            | 47 (40, 57)                         | 45 (39, 54)                   | 48 (40, 54)              | 0.11    |
| HDL – Large (nmol/L)                                     | 6.3 (4.2, 8.8)                      | 5.0 (3.5, 7.4)                | 5.5 (3.8, 8.1)           | 0.003   |
| Triglycerides (mg/dL)                                    | 95 (69, 135)                        | 109 (74, 155)                 | 107 (85, 157)            | 0.005   |
| VLDL – Large (nmol/L)                                    | 1.7 (0.6, 4.9)                      | 3.1 (0.9, 7.2)                | 4.2 (0.9, 7.5)           | <0.001  |
| LDL-C (mg/dL)                                            | 104 (85, 127)                       | 111 (87, 132)                 | 116 (85, 136)            | 0.24    |
| LDL – Large (nmol/L)                                     | 444.3 (328.1, 603.6)                | 429.1 (295.1, 543.7)          | 446.4 (340.9, 535.6)     | 0.32    |
| <i>Cardiac and Vascular MRI Measures</i>                 |                                     |                               |                          |         |
| LV Mass/BSA (g/m <sup>2</sup> )                          | 74.8 (66.4, 83.3)                   | 78.6 (69.8, 92.9)             | 81.2 (73.6, 91.4)        | 0.001   |
| LV Wall Thickness (mm)                                   | 11.2 (10.4, 12.3)                   | 11.9 (10.9, 13.1)             | 12.4 (11.4, 13.3)        | <0.001  |
| Aortic Compliance (ml/mmHg)                              | 26.8 (19.6, 36.1)                   | 23.6 (15.1, 30.0)             | 22.4 (15.1, 28.5)        | <0.001  |
| <i>Subclinical Atherosclerosis</i>                       |                                     |                               |                          |         |
| Coronary Artery Calcium Prevalence, No. (%) <sup>a</sup> | 35 (13.2)                           | 28 (19.9)                     | 8 (25.8)                 | 0.04    |
| Aortic Plaque Prevalence, No. (%) <sup>a</sup>           | 64 (25.0)                           | 45 (36.6)                     | 13 (43.3)                | 0.02    |
| Aortic Wall Thickness (mm)                               | 1.6 (1.5, 1.8)                      | 1.7 (1.5, 1.9)                | 1.7 (1.6, 1.9)           | 0.001   |
| Framingham 10-year CHD Risk Estimate (%)                 | 0 (0-2)                             | 1 (0-5)                       | 2 (1-6)                  | <0.001  |
| <i>Follow-Up</i>                                         |                                     |                               |                          |         |
| Weight (kg)                                              | 97.6 (85.3, 109.3)                  | 104.2 (89.2, 117.8)           | 107.0 (93.9, 126.1)      | <0.001  |
| BMI (kg/m <sup>2</sup> )                                 | 35.2 (31.9, 39.6)                   | 36.5 (33.1, 40.9)             | 37.0 (34.1, 44.8)        | 0.001   |
| Waist Circumference (cm)                                 | 104.1 (95.3, 113.0)                 | 108.6 (99.1, 119.4)           | 116.8 (109.2, 127.6)     | <0.001  |
| Glucose (mg/dL)                                          | 90 (85, 94)                         | 101 (93, 105)                 | 136 (110, 175)           | <0.001  |
| Hemoglobin A1C (%)                                       | 5.4 (5.1, 5.5)                      | 5.8 (5.5, 6.0)                | 6.6 (6.2, 7.7)           | <0.001  |
| HDL-C (mg/dL)                                            | 51 (42, 58)                         | 47 (41, 56)                   | 46 (41, 54)              | 0.03    |
| Triglycerides (mg/dL)                                    | 96 (73, 141)                        | 113 (83, 154)                 | 131 (105, 170)           | <0.001  |
| <i>Changes from Baseline</i>                             |                                     |                               |                          |         |
| Weight Change (kg)                                       | 1.6 (-4.1, 7.7)                     | 4.5 (-0.5, 10.5)              | 7.2 (3.5, 17.4)          | <0.001  |
| BMI Change (kg/m <sup>2</sup> )                          | 0.2 (-1.8, 2.6)                     | 1.3 (-0.6, 2.9)               | 2.2 (0.1, 5.6)           | <0.0001 |
| Waist Circumference Change (cm)                          | -1.9 (-8.5, 4.1)                    | -1.0 (-5.3, 5.3)              | 5.1 (-3.4, 9.8)          | 0.001   |
| Glucose Change (mg/dL)                                   | 1 (-4, 7)                           | 7 (2, 15)                     | 44 (24, 82)              | <0.0001 |
| HDL-C Change (mg/dL)                                     | 2 (-4, 8)                           | 2 (-6, 7)                     | 0 (-5, 5)                | 0.14    |
| Triglycerides Change (mg/dL)                             | 6 (-21, 31)                         | 7 (-22, 32)                   | 28 (-16, 62)             | 0.04    |

**eTable 2.** Characteristics of obese individuals with normal baseline fasting glucose who remained free from pre-diabetes or diabetes, those who developed pre-diabetes, and those who progressed to diabetes at follow-up (continued).

Data are presented as median (25<sup>th</sup>, 75<sup>th</sup> percentile) or proportion (%) where appropriate

<sup>a</sup>Some participants with missing values

Abbreviations: CHD=coronary heart disease; HDL-C= high-density lipoprotein cholesterol; HOMA-IR=homeostasis model assessment of insulin resistance; hs-CRP= high-sensitivity C-reactive protein; LDL-C= low-density lipoprotein cholesterol; LV= left ventricular; METs= metabolic equivalence units; VLDL= very low-density lipoprotein

**eFigure.** Unadjusted associations of visceral fat mass with incident pre-diabetes or type 2 diabetes stratified by sex, race, BMI category, presence of metabolic syndrome, and weight gain, among those with normal fasting glucose at baseline. Odds ratios represent a 1-standard deviation increment in the log-transformed visceral fat mass variable, which is approximately equal to 1.4 kg.

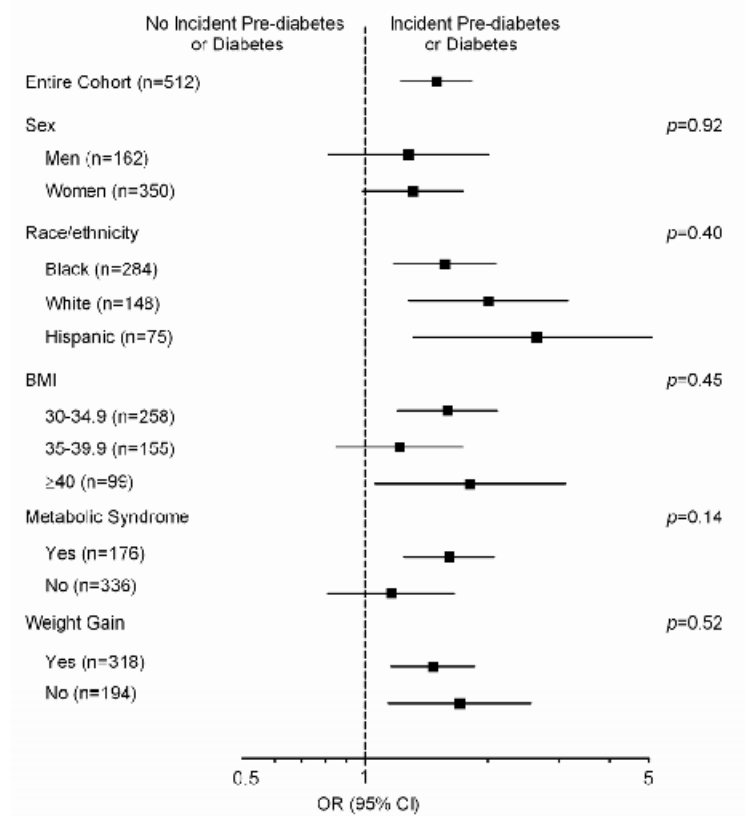

Odds ratios (OR) represent a 1-standard deviation increment in the log-transformed visceral fat mass variable, which is approximately equal to 1.4 kg.

$p$ -value is for interaction between sub-groups

BMI= body mass index
